# Supplementary material
Source: publisher figshare collection journal article supplement (https://gsajournals.figshare.com/ndownloader/files/25850753)
Supplement: Supplementary file 1 [file 25850753]

## Sheet: Table S3
Table S3. Statistics for survival assays
Stress/treatment	No. of experiments	Strain	Median survival in hours	Animals observed	p value against WT; EV	p value against daf-2; EV	p value against dpy-9(e12) control	p value against dpy-10(e128) control
20 mM PQ	exp-1	WT	58	139
		dpy-9(e12)	29	128	<0.0001
		dpy-10(e128)	29	129	<0.0001
	exp-2	WT	56	98
		dpy-9(e12)	28.3	83	<0.0001
		dpy-10(e128)	26.4	107	<0.0001
	exp-3	WT	60	103
		dpy-9(e12)	27.7	79	<0.0001
		dpy-10(e128)	27	110	<0.0001
20 mM PQ	exp-1	WT	60	49
		dpy-7(e88)	19	40	<0.0001
		dpy-8(e1281)	16	40	<0.0001
	exp-2	WT	50	90
		dpy-7(e88)	20	80	<0.0001
		dpy-8(e1281)	18.5	80	<0.0001
	exp-3	WT	67	92
		dpy-7(e88)	32.3	62	<0.0001
		dpy-8(e1281)	31.3	71	<0.0001
20 mM PQ	exp-1	WT; EV	70	120
		WT; dpy-9 RNAi	29.3	123	<0.0001
	exp-2	WT; EV	68.5	120
		WT; dpy-9 RNAi	32	120	<0.0001
	exp-3	WT; EV	66.3	99
		WT; dpy-9 RNAi	27	100	<0.0001
20 mM PQ	exp-1	WT; EV	91.5	60
		WT; dpy-4 RNAi	90.5	60	ns
		WT; dpy-5 RNAi	91.5	60	ns
		WT; dpy-7 RNAi	16	60	<0.0001
		WT; dpy-8 RNAi	23	60	<0.0001
		WT; dpy-10 RNAi	23	60	<0.0001
	exp-2	WT; EV	93.5	60
		WT; dpy-4 RNAi	85.5	60	ns
		WT; dpy-5 RNAi	90	60	ns
		WT; dpy-7 RNAi	23	60	<0.0001
		WT; dpy-8 RNAi	26	60	<0.0001
		WT; dpy-10 RNAi	23.5	60	<0.0001
	exp-3	WT; EV	77	60
		WT; dpy-4 RNAi	84.5	60	ns
		WT; dpy-5 RNAi	67.5	60	ns
		WT; dpy-7 RNAi	21.5	60	<0.0001
		WT; dpy-8 RNAi	14	60	<0.0001
		WT; dpy-10 RNAi	24.5	60	<0.0001
20 mM PQ	exp-1	dpy-9; EV	22.8	60
		dpy-9; dpy-7 RNAi	23.3	62	ns
		dpy-9; dpy-8 RNAi	23.2	60	ns
		dpy-9; dpy-10 RNAi	23	60	ns
	exp-2	dpy-9; EV	30	80
		dpy-9; dpy-7 RNAi	28	72	ns
		dpy-9; dpy-8 RNAi	27.8	75	ns
		dpy-9; dpy-10 RNAi	28	80	ns
	exp-3	dpy-9; EV	18.2	60
		dpy-9; dpy-7 RNAi	21.5	60	ns
		dpy-9; dpy-8 RNAi	20	60	ns
		dpy-9; dpy-10 RNAi	21	60	ns
20 mM PQ	exp-1	dpy-10; EV	18	81
		dpy-10; dpy-7 RNAi	18.4	80	ns
		dpy-10; dpy-8 RNAi	17.9	80	ns
		dpy-10; dpy-9 RNAi	17.5	80	ns
	exp-2	dpy-10; EV	18	80
		dpy-10; dpy-7 RNAi	17	80	ns
		dpy-10; dpy-8 RNAi	17.6	80	ns
		dpy-10; dpy-9 RNAi	18	80	ns
	exp-3	dpy-10; EV	20	79
		dpy-10; dpy-7 RNAi	19.6	80	ns
		dpy-10; dpy-8 RNAi	18.8	80	ns
		dpy-10; dpy-9 RNAi	19.5	80	ns
20 mM PQ	exp-1	WT; EV	59.7	81
		WT; dpy-2 RNAi	37	80	ns
		WT; dpy-3 RNAi	34	80	ns
		WT; bli-4 RNAi	11	80	ns
	exp-2	WT; EV	59.7	80
		WT; dpy-2 RNAi	34	80	ns
		WT; dpy-3 RNAi	35	80	ns
		WT; bli-4 RNAi	11.3	80	ns
	exp-3	WT; EV	59	79
		WT; dpy-2 RNAi	36	80	ns
		WT; dpy-3 RNAi	37	80	ns
		WT; bli-4 RNAi	10	80	ns
20 mM PQ	exp-1	WT; EV	64	75
		WT; pdi-2 RNAi	27	93	<0.0001
		WT; blmp-1 RNAi	20	92	<0.0001
	exp-2	WT; EV	68	75
		WT; pdi-2 RNAi	35	79	<0.0001
		WT; blmp-1 RNAi	31	73	<0.0001
	exp-3	WT; EV	75	65
		WT; pdi-2 RNAi	52	83	<0.0001
		WT; blmp-1 RNAi	16	67	<0.0001
20 mM PQ	exp-1	WT; EV	65	100
		daf-2(e1370); EV	190	100	<0.0001
		daf-2(e1370); dpy-7 RNAi	27	80	<0.0001	<0.0001
		daf-2(e1370); dpy-8 RNAi	22	70	<0.0001	<0.0001
		daf-2(e1370); dpy-10 RNAi	23.4	80	<0.0001	<0.0001
	exp-2	WT; EV	75	100
		daf-2(e1370); EV	179	100	<0.0001
		daf-2(e1370); dpy-7 RNAi	29	80	<0.0001	<0.0001
		daf-2(e1370); dpy-8 RNAi	35	80	<0.0001	<0.0001
		daf-2(e1370); dpy-10 RNAi	33	80	<0.0001	<0.0001
	exp-3	WT; EV	65	100
		daf-2(e1370); EV	166	100	<0.0001
		daf-2(e1370); dpy-7 RNAi	22.5	80	<0.0001	<0.0001
		daf-2(e1370); dpy-8 RNAi	15	80	<0.0001	<0.0001
		daf-2(e1370); dpy-10 RNAi	16.7	80	<0.0001	<0.0001
20 mM PQ	exp-1	WT; EV	61.8	100
		daf-2(e1370); EV	203	100	<0.0001
		daf-2(e1370); dpy-10 RNAi	18.7	80	<0.0001	<0.0001
		daf-2(e1370); daf-16 RNAi	54.8	100	<0.0001	<0.0001
	exp-2	WT; EV	74.7	100
		daf-2(e1370); EV	245	100	<0.0001
		daf-2(e1370); dpy-10 RNAi	29.3	80	<0.0001	<0.0001
		daf-2(e1370); daf-16 RNAi	72	80	ns	<0.0001
	exp-3	WT; EV	71	100
		daf-2(e1370); EV	358	100	<0.0001
		daf-2(e1370); dpy-10 RNAi	25	80	<0.0001	<0.0001
		daf-2(e1370); daf-16 RNAi	71.7	100	ns	<0.0001
5 mM N-acetyl cysteine (NAC) supplementation + 20 mM PQ	exp-1	WT	63.3	175
		WT + 5 mM NAC	77.7	125	<0.0001
		dpy-9(e12)	41.3	188	<0.0001
		dpy-9(e12) + 5 mM NAC	44.3	162	<0.0001		ns
		dpy-10(e128)	29	133	<0.0001
		dpy-10(e128) + 5 mM NAC	30.3	174	<0.0001			ns
	exp-2	WT	70.3	85
		WT + 5 mM NAC	79	125	<0.0001
		dpy-9(e12)	44	138	<0.0001
		dpy-9(e12) + 5 mM NAC	45	97	<0.0001		ns
		dpy-10(e128)	32.2	139	<0.0001
		dpy-10(e128) + 5 mM NAC	35	130	<0.0001			ns
	exp-3	WT	63	100
		WT + 5 mM NAC	71	120	<0.0001
		dpy-9(e12)	47.3	140	<0.0001		ns
		dpy-9(e12) + 5 mM NAC	47	100	<0.0001
		dpy-10(e128)	34	139	<0.0001			ns
		dpy-10(e128) + 5 mM NAC	37	130	<0.0001
2 mM PQ	exp-1	WT	13.7#	100
		dpy-9(e12)	5.2#	90	<0.0001
		dpy-10(e128)	6.4#	100	<0.0001
	exp-2	WT	12.5#	100
		dpy-9(e12)	4.67#	90	<0.0001
		dpy-10(e128)	6.07#	100	<0.0001
	exp-3	WT	14.6#	100
		dpy-9(e12)	4.93#	100	<0.0001
		dpy-10(e128)	6#	100	<0.0001
2 mM PQ	exp-1	WT	13.7#	100
		dpy-7(e88)	5.7#	100	<0.0001
		dpy-8(e1281)	6.53#	100	<0.0001
	exp-2	WT	14.5#	100
		dpy-7(e88)	6.27#	100	<0.0001
		dpy-8(e1281)	6.3#	100	<0.0001
	exp-3	WT	15#	100
		dpy-7(e88)	6.7#	100	<0.0001
		dpy-8(e1281)	6.8#	100	<0.0001
2 mM PQ	exp-1	dpy-9; EV	3.23	60
		dpy-9; dpy-7 RNAi	3.17	60	ns
		dpy-9; dpy-8 RNAi	2.6	60	ns
		dpy-9; dpy-10 RNAi	3.4	60	ns
	exp-2	dpy-9; EV	3.13	57
		dpy-9; dpy-7 RNAi	3.47	60	ns
		dpy-9; dpy-8 RNAi	3.17	60	ns
		dpy-9; dpy-10 RNAi	3.37	56	ns
	exp-3	dpy-9; EV	5.4	75
		dpy-9; dpy-7 RNAi	5.3	80	ns
		dpy-9; dpy-8 RNAi	5.15	80	ns
		dpy-9; dpy-10 RNAi	5.35	78	ns
Pseudomonas aeruginosa (PA14)	exp-1	WT	43.7	108
		dpy-9(e12)	55.2	100	<0.0001
		dpy-10(e128)	57.3	105	<0.0001
	exp-2	WT	41.3	120
		dpy-9(e12)	45.9	120	<0.0001
		dpy-10(e128)	50.4	120	<0.0001
	exp-3	WT	48.5	120
		dpy-9(e12)	53.3	120	<0.0001
		dpy-10(e128)	55.5	121	<0.0001
	exp-4	WT	43.3	90
		dpy-9(e12)	58	100	<0.0001
		dpy-10(e128)	58	100	<0.0001
Pseudomonas aeruginosa (PA14)	exp-1	WT	47.3	108
		dpy-7(e88)	64.7	100	<0.0001
		dpy-8(e1281)	68.3	105	<0.0001
	exp-2	WT	52.7	120
		dpy-7(e88)	67.3	120	<0.0001
		dpy-8(e1281)	69	120	<0.0001
	exp-3	WT	52	120
		dpy-7(e88)	68.3	120	<0.0001
		dpy-8(e1281)	70	121	<0.0001
32°C thermal stress	exp-1	WT	35.6	60
		dpy-9(e12)	48	60	<0.0001
		dpy-10(e128)	72.8	60	<0.0001
	exp-2	WT	59.5	60
		dpy-9(e12)	74.5	60	<0.0001
		dpy-10(e128)	111	60	<0.0001
	exp-3	WT	40	60
		dpy-9(e12)	60	60	<0.0001
		dpy-10(e128)	94	60	<0.0001
32°C thermal stress	exp-1	WT; EV	32.7	50
		WT; dpy-7 RNAi	62.3	50	<0.0001
		WT; dpy-8 RNAi	64.3	50	<0.0001
		WT; dpy-10 RNAi	63	50	<0.0001
	exp-2	WT; EV	32	60
		WT; dpy-7 RNAi	62	45	<0.0001
		WT; dpy-10 RNAi	66	30	<0.0001
	exp-3	WT; EV	40	60
		WT; dpy-7 RNAi	63.7	60	<0.0001
		WT; dpy-8 RNAi	71.6	40	<0.0001
		WT; dpy-10 RNAi	71.5	60	<0.0001
32°C thermal stress	exp-1	daf-2(e1370); EV	78	60
		daf-2(e1370); dpy-7 RNAi	101	60		<0.0001
		daf-2(e1370); dpy-8 RNAi	109	60		<0.0001
		daf-2(e1370); dpy-10 RNAi	102	60		<0.0001
	exp-2	daf-2(e1370); EV	68	60
		daf-2(e1370); dpy-7 RNAi	72.8	60		<0.0001
		daf-2(e1370); dpy-8 RNAi	84.4	60		<0.0001
		daf-2(e1370); dpy-10 RNAi	77	60		<0.0001
	exp-3	daf-2(e1370); EV	68.5	60
		daf-2(e1370); dpy-7 RNAi	85.5	60		<0.0001
		daf-2(e1370); dpy-8 RNAi	95	60		<0.0001
		daf-2(e1370); dpy-10 RNAi	95	60		<0.0001
32°C thermal stress	exp-1	WT; EV	51	60
		daf-2(e1370); EV	65	60	<0.0001
		daf-2(e1370); daf-16 RNAi	48	60		<0.0001
		daf-2(e1370); dpy-10 RNAi	94	60		<0.0001
	exp-2	WT; EV	49	60
		daf-2(e1370); EV	75.1	60	<0.0001
		daf-2(e1370); daf-16 RNAi	51.8	60		<0.0001
		daf-2(e1370); dpy-10 RNAi	89	60		<0.0001
	exp-3	WT; EV	49	60
		daf-2(e1370); EV	64	60	<0.0001
		daf-2(e1370); daf-16 RNAi	49	60		<0.0001
		daf-2(e1370); dpy-10 RNAi	92	60		<0.0001
Osmotic stress assay
Stress/treatment		Strain	% paralyzed worms at 10 mins of exposure	Animals observed	p value against WT; EV
500 mM NaCl stress	exp-1	WT	92.3	39
		dpy-7(e88)	0	40	<0.0001
		dpy-8(e1281)	0	40	<0.0001
		dpy-9(e12)	5.7	35	<0.0001
		dpy-10(e128)	2.5	40	<0.0001
	exp-2	WT	100	40
		dpy-7(e88)	0	30	<0.0001
		dpy-8(e1281)	0	40	<0.0001
		dpy-9(e12)	7.5	40	<0.0001
		dpy-10(e128)	2.5	40	<0.0001
	exp-3	WT	97.5	40
		dpy-7(e88)	2.5	40	<0.0001
		dpy-8(e1281)	7.5	40	<0.0001
		dpy-9(e12)	2.5	40	<0.0001
		dpy-10(e128)	0	40	<0.0001
Antihelmenthic stress assay
Stress/treatment		Strain	% paralyzed worms at 10 mins of exposure	Animals observed	p value against WT; EV
125 µM levamisole stress	exp-1	WT	11.6667	60
		dpy-4(e1166)	8.33	60	ns
		dpy-5(e61)	91.67	60	<0.0001
		dpy-7(e88)	80	60	<0.0001
		dpy-8(e1281)	86.6667	60	<0.0001
		dpy-9(e12)	78.3333	60	<0.0001
	exp-2	WT	13.3333	60
		dpy-4(e1166)	10	60	ns
		dpy-5(e61)	96.67	60	<0.0001
		dpy-7(e88)	93.3333	60	<0.0001
		dpy-8(e1281)	93.3333	60	<0.0001
		dpy-9(e12)	80	60	<0.0001
	exp-3	WT	16.7	30
		dpy-4(e1166)	17.5	40	ns
		dpy-5(e61)	70	40	<0.0001
		dpy-7(e88)	80	40	<0.0001
		dpy-8(e1281)	71.1	45	<0.0001
		dpy-9(e12)	90	40	<0.0001
125 µM levamisole stress	exp-1	WT	8	50
		dpy-10(e128)	82	60	<0.0001
	exp-2	WT	10	50
		dpy-10(e128)	88	50	<0.0001
	exp-3	WT	2	50
		dpy-10(e128)	86	50	<0.0001
125 µM levamisole stress	exp-1	WT;EV	10	50
		WT;dpy-2 RNAi	92
		WT;dpy-3 RNAi	92	60	<0.0001
	exp-2	WT;EV	4	50
		WT;dpy-2 RNAi	94
		WT;dpy-3 RNAi	88	50	<0.0001
	exp-3	WT;EV	6	50
		WT;dpy-2 RNAi	94
		WT;dpy-3 RNAi	96	50	<0.0001
50 µM Ivermectin stress	exp-1	WT	5	40
		dpy-4(e1166)	20	40	ns
		dpy-5(e61)	25	40	ns
		dpy-7(e88)	92.5	40	<0.0001
		dpy-8(e1281)	95	40	<0.0001
		dpy-9(e12)	90	40	<0.0001
		dpy-10(e128)	97.5	40	<0.0001
	exp-2	WT	3.33333	30
		dpy-4(e1166)	10	30	ns
		dpy-5(e61)	13.3	30	ns
		dpy-7(e88)	71.4286	35	<0.0001
		dpy-8(e1281)	93.3333	30	<0.0001
		dpy-9(e12)	86.6667	30	<0.0001
		dpy-10(e128)	90	30	<0.0001
	exp-3	WT	3.33333	30
		dpy-4(e1166)	0	30	ns
		dpy-5(e61)	3.3	30	ns
		dpy-7(e88)	90	30	<0.0001
		dpy-8(e1281)	86.6667	30	<0.0001
		dpy-9(e12)	100	30	<0.0001
		dpy-10(e128)	93.3333	30	<0.0001
125 µM Ivermectin stress	exp-1	WT;EV	2	50
		WT;dpy-2 RNAi	96
		WT;dpy-3 RNAi	96	60	<0.0001
	exp-2	WT;EV	4	50
		WT;dpy-2 RNAi	96
		WT;dpy-3 RNAi	94	50	<0.0001
	exp-3	WT;EV	0	50
		WT;dpy-2 RNAi	100
		WT;dpy-3 RNAi	98	50	<0.0001
